# Supplementary material
Source: PubMed Central journal article supplement (PMC5665176)
Supplement: NIHMS912925-supplement-supplement_1.pdf [file NIHMS912925-supplement-supplement_1.pdf]

## Status of Early Career Academic Cardiology, A Global Perspective

### Supplementary Material

#### Additional Methods Details

Total National Institute of Health Research per state was extracted in the following manner at <https://projectreporter.nih.gov/reporter.cfm> website. Choose active FY 2017 projects. Make the selections in the funding mechanism in the project details section. Selections include: research project grants (non SBIR/STTR), research centers, other research related, training-individual, training-institutional, R&D contracts (non SBIR/STTR), other. Submit query. After results return, select summary by state under “data & visualize” tab. Then, choose export data to Excel option.

We modified collection of grant funding information to increase representation and reduce uncertainty in the 2016 survey. In 2013, only receiving grant as a principal investigator (PI) was counted. In 2016, this was broadened to include Co-PI and co-investigators. In 2013, the survey asked inclusion of both direct and indirect cost. The PI receives direct cost. The institution receives indirect cost. It is uncertain how much indirect cost benefited the PI. Investigators themselves may not know the indirect cost amount. Some funding agencies such as American Heart Association only allow very small to no indirect cost. Due to uncertainty, the indirect cost was not used in the 2016 survey. This methodological change did not cause differences in threshold based analysis. Obtaining a NIH K-grant level funding would have crossed >\$499K in both methods. Obtaining NIH R01 grant level funding would have crossed > \$1M in both methods. Therefore, setting a threshold at >\$499K will identify early career academic cardiologists who obtained NIH K-grant or better by both methods. The change in methodology also did not impact correlation analysis because this type of analysis determines the strength of relationship between two variables (e.g. institutional resource ranking versus early career academic cardiologist grant funding) not the absolute amounts. Thus, the change in methodology should have added early career academic cardiologists who received grant funding without being the PI while making the results comparable to the 2013 study.

**Additional Results**

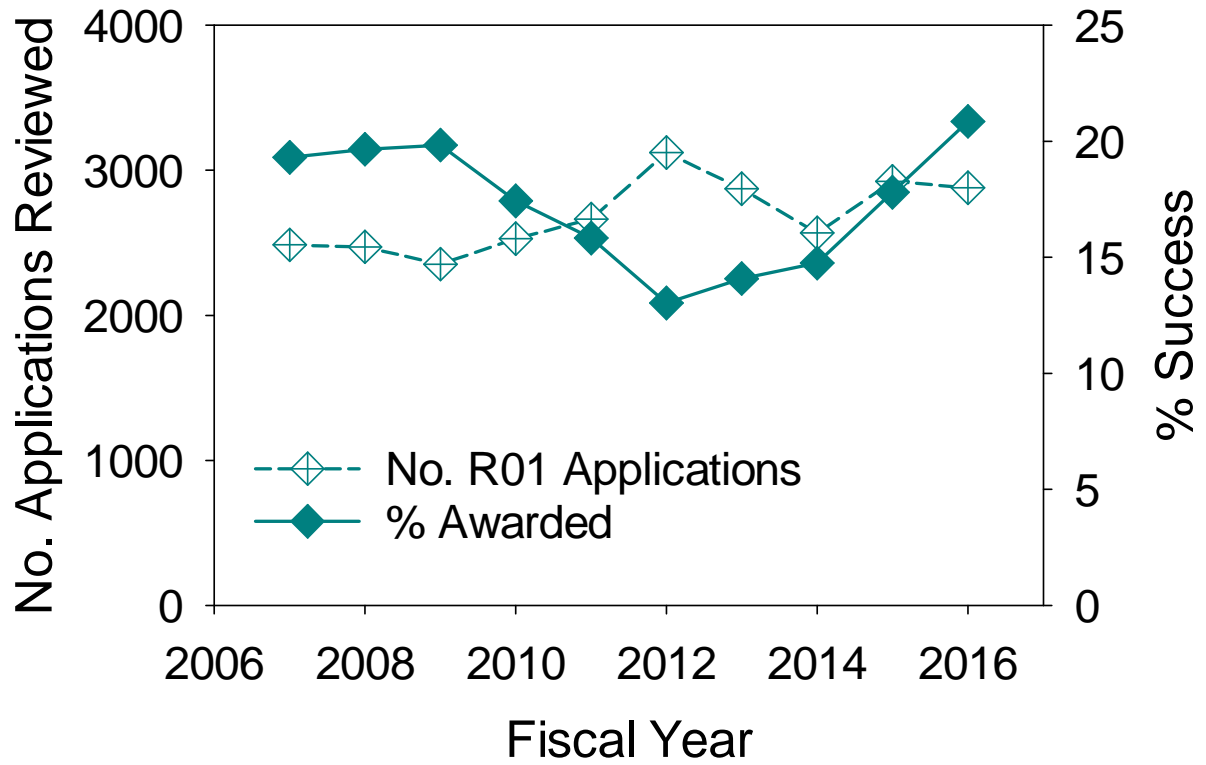

**Figure S1: National Heart Lung and Blood Institute R01 Success Rates (2007-2016).** Data was extracted from National Institutes of Health, Office of Extramural Research Table #206.(1)

**Table S1: Total Grant Funding Reported by Early Career Academic Cardiologists in 2013**

| <b>Primary Country</b> | <b>N</b>   | <b>Mean</b>    | <b>Median</b> | <b>Std. Deviation</b> | <b>Std. Error of Mean</b> | <b>Maximum</b>   | <b>Sum</b>        |
|------------------------|------------|----------------|---------------|-----------------------|---------------------------|------------------|-------------------|
| Unknown                | 12         | 10,833         | 0             | 37,528                | 10,833                    | 130000           | 130,000           |
| Canada                 | 6          | 750,833        | 402,500       | 987,220               | 403,031                   | 2500000          | 4,505,000         |
| Germany                | 2          | 229            | 229           | 324                   | 229                       | 458              | 458               |
| India                  | 1          | 0              | 0             | .                     | .                         | 0                | 0                 |
| Israel                 | 2          | 0              | 0             | 0                     | 0                         | 0                | 0                 |
| Japan                  | 1          | 25,000         | 25,000        | .                     | .                         | 25,000           | 25,000            |
| Malaysia               | 1          | 0              | 0             | .                     | .                         | 0                | 0                 |
| Netherlands            | 1          | 1,000,000      | 1,000,000     | .                     | .                         | 1,000,000        | 1,000,000         |
| Pakistan               | 1          | 0              | 0             | .                     | .                         | 0                | 0                 |
| Portugal               | 1          | 0              | 0             | .                     | .                         | 0                | 0                 |
| United States          | 190        | 110,500        | 0             | 474,319               | 34,411                    | 5,000,000        | 20,995,000        |
| <b>Overall</b>         | <b>218</b> | <b>122,273</b> | <b>0</b>      | <b>484,100</b>        | <b>32,787</b>             | <b>5,000,000</b> | <b>26,655,458</b> |

**Table S2: Total Grant Funding Reported by Early Career Academic Cardiologists in 2016**

| <b>Primary Country</b>    | <b>N</b>   | <b>Mean</b>   | <b>Median</b> | <b>Std. Deviation</b> | <b>Std. Error of Mean</b> | <b>Maximum</b>   | <b>Sum</b>        |
|---------------------------|------------|---------------|---------------|-----------------------|---------------------------|------------------|-------------------|
| Barbados                  | 1          | 0             | 0             | .                     | .                         | 0                | 0                 |
| Brazil                    | 2          | 0             | 0             | 0                     | 0                         | 0                | 0                 |
| Canada                    | 24         | 48,958        | 0             | 155,773               | 31,797                    | 600,000          | 117,5000          |
| China                     | 5          | 2,000         | 0             | 4,472                 | 2,000                     | 10,000           | 1,0000            |
| Dominican Republic        | 2          | 0             | 0             | 0                     | 0                         | 0                | 0                 |
| Egypt                     | 1          | 0             | 0             | .                     | .                         | 0                | 0                 |
| Germany                   | 1          | 0             | 0             | .                     | .                         | 0                | 0                 |
| Hong Kong                 | 1          | 0             | 0             | .                     | .                         | 0                | 0                 |
| Hungary                   | 1          | 0             | 0             | .                     | .                         | 0                | 0                 |
| India                     | 9          | 0             | 0             | 0                     | 0                         | 0                | 0                 |
| Iran(Islamic Republic Of) | 1          | 0             | 0             | .                     | .                         | 0                | 0                 |
| Israel                    | 6          | 0             | 0             | 0                     | 0                         | 0                | 0                 |
| Italy                     | 1          | 0             | 0             | .                     | .                         | 0                | 0                 |
| Jamaica                   | 1          | 0             | 0             | .                     | .                         | 0                | 0                 |
| Japan                     | 1          | 0             | 0             | .                     | .                         | 0                | 0                 |
| Malaysia                  | 4          | 0             | 0             | 0                     | 0                         | 0                | 0                 |
| Mexico                    | 6          | 0             | 0             | 0                     | 0                         | 0                | 0                 |
| Nigeria                   | 1          | 0             | 0             | .                     | .                         | 0                | 0                 |
| Pakistan                  | 4          | 0             | 0             | 0                     | 0                         | 0                | 0                 |
| Russian Federation        | 2          | 0             | 0             | 0                     | 0                         | 0                | 0                 |
| Singapore                 | 1          | 0             | 0             | .                     | .                         | 0                | 0                 |
| Spain                     | 14         | 5,786         | 0             | 12,442                | 3,325                     | 41,000           | 81,000            |
| Taiwan                    | 4          | 0             | 0             | 0                     | 0                         | 0                | 0                 |
| Thailand                  | 2          | 0             | 0             | 0                     | 0                         | 0                | 0                 |
| Trinidad And Tobago       | 1          | 0             | 0             | .                     | .                         | 0                | 0                 |
| Turkey                    | 14         | 10,714        | 0             | 40,089                | 10,714                    | 15,0000          | 15,0000           |
| United Kingdom            | 2          | 4,000,000     | 4,000,000     | 5,656,854             | 4,000,000                 | 8,000,000        | 8,000,000         |
| United States             | 444        | 73,175        | 0             | 279,817               | 13,280                    | 3,050,000        | 32,489,635        |
| Venezuela                 | 2          | 0             | 0             | 0                     | 0                         | 0                | 0                 |
| <b>Overall</b>            | <b>558</b> | <b>75,100</b> | <b>0</b>      | <b>420,645</b>        | <b>17,807</b>             | <b>8,000,000</b> | <b>41,905,635</b> |

**Table S3: Reasons for Leaving Academic Cardiology**

| <b>Reason</b>                                   | <b>US, n=139</b> | <b>International, n=38</b> |
|-------------------------------------------------|------------------|----------------------------|
| Personal compensation too low                   | 58% *            | 34%                        |
| Insufficient support for career development     | 48%              | 53%                        |
| Lack of actual usable time for academics        | 48% *            | 21%                        |
| Unfair internal value (e.g. RVUs)               | 43% *            | 18%                        |
| Insufficient resources                          | 35%              | 37%                        |
| Insufficient flexibility in work schedule       | 28%              | 40%                        |
| Too great of overall burden                     | 27%              | 24%                        |
| Overwhelming regulatory compliance requirements | 17%              | 13%                        |
| Unfair external competition                     | 12%              | 8%                         |
| Other                                           | 9%               | 0%                         |
| None                                            | 5%               | 8%                         |

The survey asked respondents to select one choice on likelihood of leaving academic cardiology during the next 12 months (Not likely, 2, 3, 4, extremely likely). Analysis was done on the reasons for leaving academic cardiology of US and international members who chose responses of 3 through extremely likely. Z-test was done to compare US *versus* International member proportions. \* denotes  $p < 0.05$ .

**Table S4: Cardiovascular Fellowship Programs That Has Active National Heart Lung and Blood Institute T-32 Training Grants in 2017 Federal Fiscal Year**

| <b>Organization Name</b>               |
|----------------------------------------|
| BAYLOR COLLEGE OF MEDICINE             |
| BETH ISRAEL DEACONESS MEDICAL CENTER   |
| BOSTON CHILDRENS HOSPITAL              |
| BRIGHAM AND WOMENS HOSPITAL            |
| BROWN UNIVERSITY                       |
| CEDARS SINAI MEDICAL CENTER            |
| MASSACHUSETTS GENERAL HOSPITAL         |
| MEDICAL COLLEGE OF WISCONSIN           |
| MEDICAL UNIVERSITY OF SOUTH CAROLINA   |
| NEW YORK UNIVERSITY SCHOOL OF MEDICINE |
| OREGON HEALTH SCIENCE UNIVERSITY       |
| RHODE ISLAND HOSPITAL                  |
| UNIVERSITY OF ALABAMA AT BIRMINGHAM    |
| UNIVERSITY OF ARIZONA                  |
| UNIVERSITY OF CALIFORNIA SAN DIEGO     |
| UNIVERSITY OF CALIFORNIA SAN FRANCISCO |
| UNIVERSITY OF CHICAGO                  |
| UNIVERSITY OF FLORIDA                  |
| UNIVERSITY OF ILLINOIS AT CHICAGO      |
| UNIVERSITY OF KENTUCKY                 |
| UNIVERSITY OF MINNESOTA                |
| UNIVERSITY OF ROCHESTER                |
| UNIVERSITY OF UTAH                     |
| UNIVERSITY OF WASHINGTON               |
| VANDERBILT UNIVERSITY                  |
| VANDERBILT UNIVERSITY MEDICAL CENTER   |

National Heart Lung and Blood Institute (NHLBI) active T32 training grant data was extracted from National Institutes of Health Reporter (<https://projectreporter.nih.gov>) using project type T32 and center code HL. Afterwards, the data was matched against American College of Cardiology database to identify cardiovascular disease fellowship programs that has active NHLBI T32 grant.

## References

1. NIH. Table #206, Research Project Grants, Competing Applications, Awards, Success Rate and Total Funding by Application Type, NIH Institutes/Centers and Activity Code, Fiscal Years 2007-2016. In: Services HaH, editor. Bethesda MD, 2017.
